# Supplementary material
Source: PubMed Central journal article supplement (PMC2934918)
Supplement: 00449.2010_1.pdf [file 00449.2010_1.pdf]

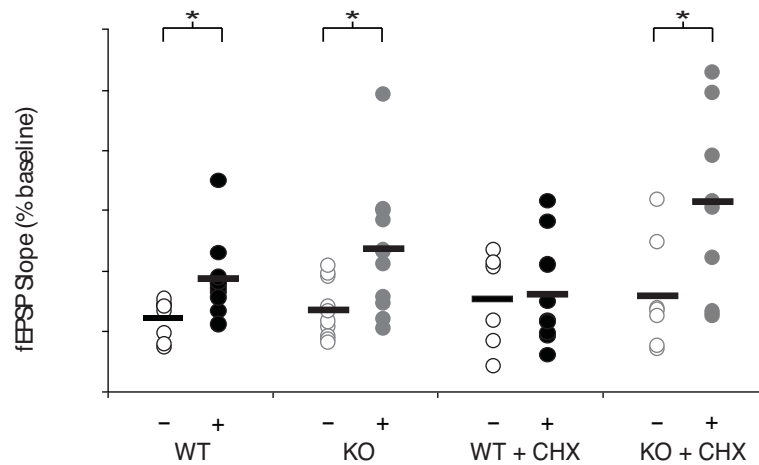

**Supplemental Figure 1.** Scatter plots to show the variability in DHPG induced priming of LTP in wildtype and *Fmr1* KO mice. Each data point represents the average response (as percent of baseline) observed from an individual slice 55-60 minutes post tetanus. Wildtype unprimed: open black circles, wildtype primed: closed black circles, *Fmr1* KO unprimed: open gray circles, *Fmr1* KO primed: closed gray circles. Black bars represent the average of all slices in each group. Asterisks denote significant differences (unpaired student's t test,  $p < 0.05$ ).
